# Supplementary material
Source: PubMed Central journal article supplement (PMC3581410)
Supplement: supp_M112.409169_jbc.M112.409169-1.pdf [file supp_M112.409169_jbc.M112.409169-1.pdf]

The N-terminus of  $\alpha$ -Subunit Isoforms is Involved in  
Signaling between V-ATPase and Cytohesin-2\*<sup>S</sup>

Hiroyuki Hosokawa<sup>1</sup>, Phat Vinh Dip<sup>3</sup>, Maria Merkulova<sup>1</sup>, Anastasia Bakulina<sup>4</sup>,  
Zhenjie Zhuang<sup>1</sup>, Ashok Khatri<sup>5</sup>, Xiaoying Jian<sup>6</sup>, Shawn M. Keating<sup>7,8</sup>,  
Stephanie A. Bueler<sup>7</sup>, John L. Rubinstein<sup>7,8</sup>, Paul A. Randazzo<sup>6</sup>, Dennis A. Ausiello<sup>1,2</sup>,  
Gerhard Grüber<sup>3</sup> and Vladimir Marshansky<sup>1,2#</sup>

SUPPLEMENTAL DATA

SUPPLEMENTAL LEGENDS

**Table S1.** Synthesis of V-ATPase  $\alpha$ 1-,  $\alpha$ 2-,  $\alpha$ 3- and  $\alpha$ 4-subunit isoforms derived peptides coupled with PEG or TAT sequence to render them soluble and cell permeable. Peptides were further coupled at the N-terminus with either: i) biotin (in blue), ii) fluorescein isothiocyanate (FITC)(in green), iii) 5-carboxy-fluorescein (Fluor)(in green) or 5-carboxy-teramethyl rhodamine (CTMR)(in red). After testing all peptides for their solubility and cell permeability in our experiments following peptides: i) Biotin- $\alpha$ 2N<sub>1-17</sub>-TAT; ii) FITC- $\alpha$ 2N<sub>1-17</sub>-TAT; iii) FITC- $\alpha$ 1N<sub>1-17</sub>-TAT; iv) FITC- $\alpha$ 3N<sub>1-17</sub>-TAT; v) FITC- $\alpha$ 4N<sub>1-17</sub>-TAT as well as FITC-TAT as control were used.

**Table S2.** Structural statistics of the peptide  $\alpha$ 2N<sub>1-17</sub>.

**Movie S1.** Arf1/Sec7/ $\alpha$ 2N<sub>1-17</sub> complex.mov

**Movie S2.** Arf6/Sec7/ $\alpha$ 2N<sub>1-17</sub> complex.mov

**Table S1**

|                                                       |                                                                                                                                                                                                                                |                                                                                                                                                                                                                                                    |
|-------------------------------------------------------|--------------------------------------------------------------------------------------------------------------------------------------------------------------------------------------------------------------------------------|----------------------------------------------------------------------------------------------------------------------------------------------------------------------------------------------------------------------------------------------------|
| <b>Peptide Synthesis #1:</b><br>Peptides labeling #1: | <p>PEG - a2N<sub>1-17</sub><br/>           Biotin - PEG - a2N<sub>1-17</sub><br/>           Fluor - PEG - a2N<sub>1-17</sub></p>                                                                                               | <p>PEG - MGSLFRSESMCLAQLFL<br/>           Biotin - PEG - MGSLFRSESMCLAQLFL<br/>           Fluor - PEG - MGSLFRSESMCLAQLFL</p>                                                                                                                      |
| <b>Peptide Synthesis #2:</b><br>Peptides labeling #2: | <p>a2N<sub>1-17</sub> - PEG<br/>           Biotin - a2N<sub>1-17</sub> - PEG<br/>           Fluor - a2N<sub>1-17</sub> - PEG</p>                                                                                               | <p>MGSLFRSESMCLAQLFL - PEG<br/>           Biotin - MGSLFRSESMCLAQLFL - PEG<br/>           Fluor - MGSLFRSESMCLAQLFL - PEG</p>                                                                                                                      |
| <b>Peptide Synthesis #3:</b><br>Peptides labeling #3: | <p>TAT - a2N<sub>1-17</sub><br/>           Biotin - TAT - a2N<sub>1-17</sub><br/>           Fluor - TAT - a2N<sub>1-17</sub></p>                                                                                               | <p>YGRKKRRQRRRMGSLFRSESMCLAQLFL<br/>           Biotin - YGRKKRRQRRRMGSLFRSESMCLAQLFL<br/>           Fluor - YGRKKRRQRRRMGSLFRSESMCLAQLFL</p>                                                                                                       |
| <b>Peptide Synthesis #4:</b><br>Peptides labeling #4: | <p>a2N<sub>1-17</sub> - TAT<br/>           Biotin - a2N<sub>1-17</sub> - TAT<br/>           Fluor - a2N<sub>1-17</sub> - TAT<br/>           FITC - a2N<sub>1-17</sub> - TAT<br/>           CTMR - a2N<sub>1-17</sub> - TAT</p> | <p>MGSLFRSESMCLAQLFLYGRKKRRQRRR<br/>           Biotin - MGSLFRSESMCLAQLFLYGRKKRRQRRR<br/>           Fluor - MGSLFRSESMCLAQLFLYGRKKRRQRRR<br/>           FITC - MGSLFRSESMCLAQLFLYGRKKRRQRRR<br/>           CTMR - MGSLFRSESMCLAQLFLYGRKKRRQRRR</p> |
| <b>Peptide Synthesis #5:</b><br>Peptides labeling #5: | <p>TAT<br/>           FITC - TAT<br/>           CTMR - TAT</p>                                                                                                                                                                 | <p>YGRKKRRQRRR<br/>           FITC - YGRKKRRQRRR<br/>           CTMR - YGRKKRRQRRR</p>                                                                                                                                                             |
| <b>Peptide Synthesis #6:</b><br>Peptides labeling #6: | <p>a1N<sub>1-17</sub> - TAT<br/>           a3N<sub>1-17</sub> - TAT<br/>           a4N<sub>1-17</sub> - TAT</p>                                                                                                                | <p>MGELFRSEEMTLAQLFLYGRKKRRQRRR<br/>           MGSMFRSEEVQVLLLYGRKKRRQRRR<br/>           MASVFRSEEMCLSQVFLYGRKKRRQRRR</p>                                                                                                                          |
|                                                       | <p>FITC - a1N<sub>1-17</sub> - TAT<br/>           FITC - a3N<sub>1-17</sub> - TAT<br/>           FITC - a4N<sub>1-17</sub> - TAT</p>                                                                                           | <p>FITC - MGELFRSEEMTLAQLFLYGRKKRRQRRR<br/>           FITC - MGSMFRSEEVQVLLLYGRKKRRQRRR<br/>           FITC - MASVFRSEEMCLSQVFLYGRKKRRQRRR</p>                                                                                                     |

**Table S2****Structural statistics of the peptide a2N<sub>1-17</sub>**

---

**Distance restraints**

|                                        |     |
|----------------------------------------|-----|
| Total                                  | 233 |
| Intraresidue ( $i - j = 0$ )           | 77  |
| Sequential ( $ i-j  = 1$ )             | 81  |
| Medium-range ( $2 \leq  i-j  \leq 4$ ) | 75  |
| Long-range ( $ i-j  \geq 5$ )          | 0   |

**Average number of violations**

|                                         |   |
|-----------------------------------------|---|
| Distance violations $> 0.5 \text{ \AA}$ | 0 |
|-----------------------------------------|---|

**Ramachandran plot<sup>2</sup> (%)**

|                                          |      |
|------------------------------------------|------|
| Residues in most favoured regions        | 78.2 |
| Residues in additionally allowed regions | 21.8 |
| Residues in generously allowed regions   | 0    |
| Residues in disallowed regions           | 0    |

**Average RMSD to Mean ( $\text{\AA}$ )**

|                                                       |       |
|-------------------------------------------------------|-------|
| Residues 11-19, Backbone ( $C^\alpha$ , $C'$ , and N) | 0.311 |
| rmsd heavy atoms                                      | 1.355 |
